# Supplementary material for: POC1A acts as a promising prognostic biomarker associated with high tumor immune cell infiltration in gastric cancer
Source: publisher site journal article supplement (doi:10.18632/aging.103624), 2020-10-14
Supplement: Supplementary file [file aging-v12i19-103624-supplementary-material-SD5.pdf]

## SUPPLEMENTARY TABLES

Supplementary Table 8. Significant KEGG pathways of alteration genes of POC1A.

| <b>ID</b> | <b>Description</b>                       | <b>GeneRatio</b> | <b>BgRatio</b> | <b>pvalue</b> | <b>p.adjust</b> | <b>qvalue</b> | <b>Count</b> |
|-----------|------------------------------------------|------------------|----------------|---------------|-----------------|---------------|--------------|
| hsa04260  | Cardiac muscle contraction               | 6/73             | 86/8016        | 0.00012251    | 0.01296701      | 0.01246601    | 6            |
| hsa05410  | Hypertrophic cardiomyopathy (HCM)        | 6/73             | 90/8016        | 0.00015765    | 0.01296701      | 0.01246601    | 6            |
| hsa05414  | Dilated cardiomyopathy (DCM)             | 6/73             | 96/8016        | 0.00022486    | 0.01296701      | 0.01246601    | 6            |
| hsa00260  | Glycine, serine and threonine metabolism | 4/73             | 40/8016        | 0.00045152    | 0.01952831      | 0.01877379    | 4            |
| hsa00531  | Glycosaminoglycan degradation            | 3/73             | 19/8016        | 0.00063237    | 0.02187986      | 0.02103448    | 3            |
| hsa04360  | Axon guidance                            | 7/73             | 181/8016       | 0.00123623    | 0.03564476      | 0.03426755    | 7            |

**Supplementary Table 9. Significant GO annotations of alteration genes of POC1A (Biological Process and Molecular Functions).**

| <b>ID</b>  | <b>Description</b>                                              | <b>GeneRatio</b> | <b>BgRatio</b> | <b>pvalue</b> | <b>p.adjust</b> | <b>qvalue</b> | <b>Count</b> |
|------------|-----------------------------------------------------------------|------------------|----------------|---------------|-----------------|---------------|--------------|
| GO:0030212 | hyaluronan metabolic process                                    | 6/166            | 37/18670       | 8.35E-07      | 0.00263953      | 0.00228095    | 6            |
| GO:0050919 | negative chemotaxis                                             | 6/166            | 46/18670       | 3.15E-06      | 0.00497728      | 0.00430112    | 6            |
| GO:0016049 | cell growth                                                     | 16/166           | 484/18670      | 6.90E-06      | 0.00726886      | 0.00628138    | 16           |
| GO:0001558 | regulation of cell growth                                       | 14/166           | 416/18670      | 2.18E-05      | 0.01721154      | 0.01487336    | 14           |
| GO:0071493 | cellular response to UV-B                                       | 3/166            | 8/18670        | 3.74E-05      | 0.02365151      | 0.02043846    | 3            |
| GO:1903510 | mucopolysaccharide metabolic process                            | 7/166            | 112/18670      | 6.41E-05      | 0.03056102      | 0.02640931    | 7            |
| GO:0050808 | synapse organization                                            | 13/166           | 408/18670      | 7.53E-05      | 0.03056102      | 0.02640931    | 13           |
| GO:0048843 | negative regulation of axon extension involved in axon guidance | 4/166            | 26/18670       | 7.73E-05      | 0.03056102      | 0.02640931    | 4            |
| GO:1902668 | negative regulation of axon guidance                            | 4/166            | 28/18670       | 0.00010447    | 0.03669279      | 0.03170808    | 4            |
| GO:0004415 | hyaluronoglucosaminidase activity                               | 3/164            | 8/17697        | 4.23E-05      | 0.01355295      | 0.01137836    | 3            |
| GO:0030215 | semaphorin receptor binding                                     | 4/164            | 23/17697       | 5.49E-05      | 0.01355295      | 0.01137836    | 4            |
| GO:0033906 | hyaluronoglucuronidase activity                                 | 2/164            | 2/17697        | 8.54E-05      | 0.01405602      | 0.01180071    | 2            |
| GO:0015929 | hexosaminidase activity                                         | 3/164            | 15/17697       | 0.00032759    | 0.04045704      | 0.03396564    | 3            |
| GO:0098882 | structural constituent of presynaptic active zone               | 2/164            | 4/17697        | 0.00050593    | 0.04600134      | 0.03862035    | 2            |
| GO:0038191 | neuropilin binding                                              | 3/164            | 18/17697       | 0.00057562    | 0.04600134      | 0.03862035    | 3            |
| GO:0000828 | inositol hexakisphosphate kinase activity                       | 2/164            | 5/17697        | 0.00083808    | 0.04600134      | 0.03862035    | 2            |
| GO:0000832 | inositol hexakisphosphate 5-kinase activity                     | 2/164            | 5/17697        | 0.00083808    | 0.04600134      | 0.03862035    | 2            |
| GO:0099181 | structural constituent of presynapse                            | 2/164            | 5/17697        | 0.00083808    | 0.04600134      | 0.03862035    | 2            |

**Supplementary Table 10. Correlations between immune infiltration levels of different immune cells and copy number alteration (CNA) of POC1A.**

| <b>Cancer</b> | <b>Immune Cells</b> | <b>CNA</b>         | <b>P value</b> |
|---------------|---------------------|--------------------|----------------|
| STAD          | B Cell              | Deep Deletion      | 0.51849727     |
| STAD          | B Cell              | Arm-level Deletion | 0.01064684     |
| STAD          | B Cell              | Diploid/Normal     | 1              |
| STAD          | B Cell              | Arm-level Gain     | 0.22262003     |
| STAD          | B Cell              | High Amplication   | 1              |
| STAD          | CD8+ T Cell         | Deep Deletion      | 0.21722101     |
| STAD          | CD8+ T Cell         | Arm-level Deletion | 0.00358451     |
| STAD          | CD8+ T Cell         | Diploid/Normal     | 1              |
| STAD          | CD8+ T Cell         | Arm-level Gain     | 0.00282367     |
| STAD          | CD8+ T Cell         | High Amplication   | 1              |
| STAD          | CD4+ T Cell         | Deep Deletion      | 0.45450308     |
| STAD          | CD4+ T Cell         | Arm-level Deletion | 0.00141845     |
| STAD          | CD4+ T Cell         | Diploid/Normal     | 1              |
| STAD          | CD4+ T Cell         | Arm-level Gain     | 0.01199774     |
| STAD          | CD4+ T Cell         | High Amplication   | 1              |
| STAD          | Macrophage          | Deep Deletion      | 0.23318168     |
| STAD          | Macrophage          | Arm-level Deletion | 0.00456658     |
| STAD          | Macrophage          | Diploid/Normal     | 1              |
| STAD          | Macrophage          | Arm-level Gain     | 0.0007265      |
| STAD          | Macrophage          | High Amplication   | 1              |
| STAD          | Neutrophil          | Deep Deletion      | 0.28499674     |
| STAD          | Neutrophil          | Arm-level Deletion | 4.14E-05       |
| STAD          | Neutrophil          | Diploid/Normal     | 1              |
| STAD          | Neutrophil          | Arm-level Gain     | 0.0389077      |
| STAD          | Neutrophil          | High Amplication   | 1              |
| STAD          | Dendritic Cell      | Deep Deletion      | 0.14183773     |
| STAD          | Dendritic Cell      | Arm-level Deletion | 1.55E-05       |
| STAD          | Dendritic Cell      | Diploid/Normal     | 1              |
| STAD          | Dendritic Cell      | Arm-level Gain     | 0.01030807     |
| STAD          | Dendritic Cell      | High Amplication   | 1              |
